# Supplementary material for: Fasting-induced hormonal regulation of lysosomal function
Source: PubMed Central journal article supplement (PMC5518872; doi:10.1038/cr.2017.45), 2017-04-04
Supplement: cr201745x1.pdf [file cr201745x1.pdf]

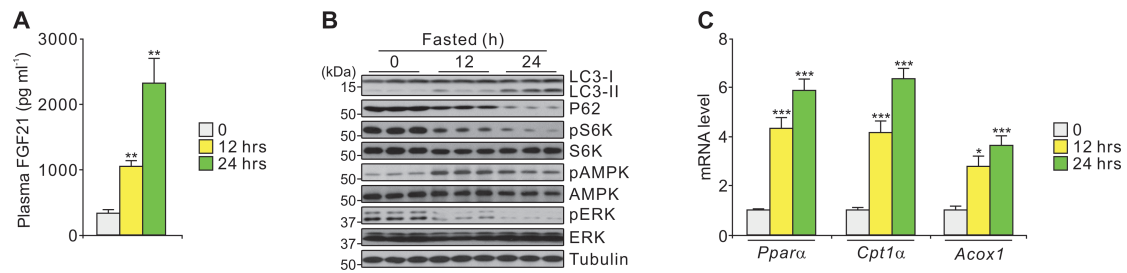

**Supplementary information, Figure S1. Correlation of FGF21 level, autophagy and lipid metabolism.** Plasma FGF21 levels (A), immunoblots (B) and qPCR results (C) showing expression levels of genes (*Ppara*, *Cpt1* and *Acox1*) involved in fatty acid  $\beta$ -oxidation of liver extracts from mice fed a regular diet or fasted for 12 h or 24 h. Data are shown as mean  $\pm$  s.e.m. \* $P < 0.05$ , \*\* $P < 0.01$ , \*\*\* $P < 0.001$ ,  $n = 6$  mice per group.
