# Supplementary material for: Fasting-induced hormonal regulation of lysosomal function
Source: PubMed Central journal article supplement (PMC5518872; doi:10.1038/cr.2017.45), 2017-04-04
Supplement: cr201745x2.pdf [file cr201745x2.pdf]

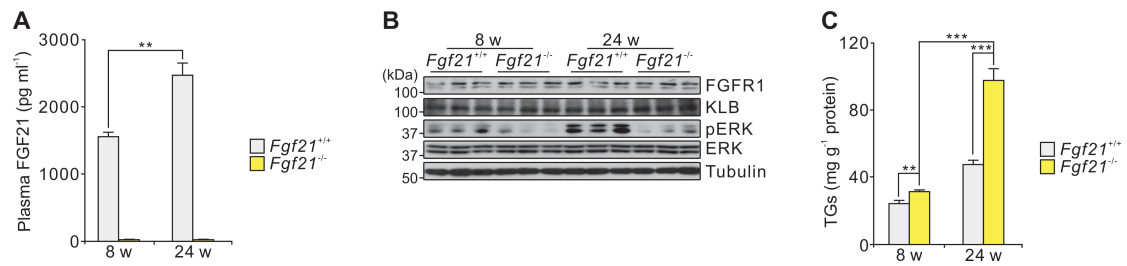

**Supplementary information, Figure S2. Comparison of FGF21 signaling in young and aged mice.** Plasma FGF21 levels (**A**), immunoblots (**B**) and hepatic triglyceride levels (**C**) in 8-week- or 24-week-old mice fasted for 24 h. Data are shown as mean  $\pm$  s.e.m. **\*\*** $P < 0.01$ , **\*\*\*** $P < 0.001$ ,  $n = 6$  mice per group.
