# Supplementary material for: Fasting-induced hormonal regulation of lysosomal function
Source: PubMed Central journal article supplement (PMC5518872; doi:10.1038/cr.2017.45), 2017-04-04
Supplement: cr201745x3.pdf [file cr201745x3.pdf]

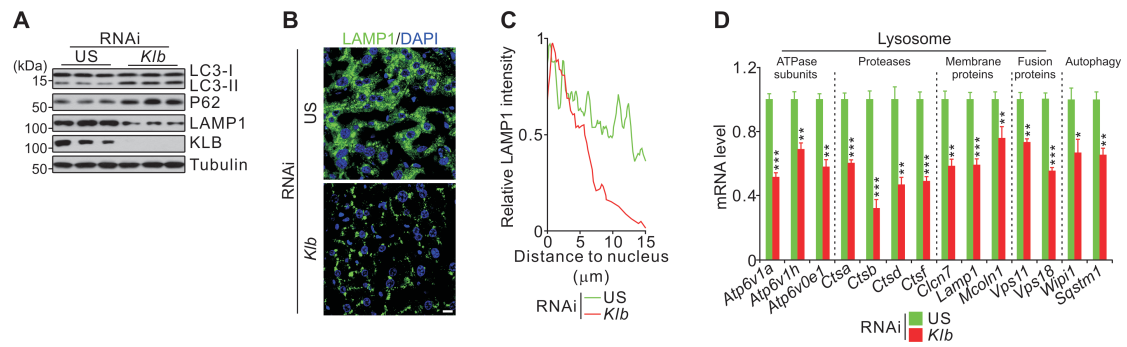

**Supplementary information, Figure S3. Effect of *Klb* knockdown on lysosomal function.** Immunoblots (**A**), LAMP1 staining (**B**) and quantification (**C**), and qPCR results (**D**) showing the effect of *Klb* knockdown in mice fasted for 24 h. Scale bar, 10 μm. Data are shown as mean ± s.e.m. \* $P < 0.05$ , \*\* $P < 0.01$ , \*\*\* $P < 0.001$ , n = 8 mice per group.
