# Supplementary material for: Fasting-induced hormonal regulation of lysosomal function
Source: PubMed Central journal article supplement (PMC5518872; doi:10.1038/cr.2017.45), 2017-04-04
Supplement: cr201745x4.pdf [file cr201745x4.pdf]

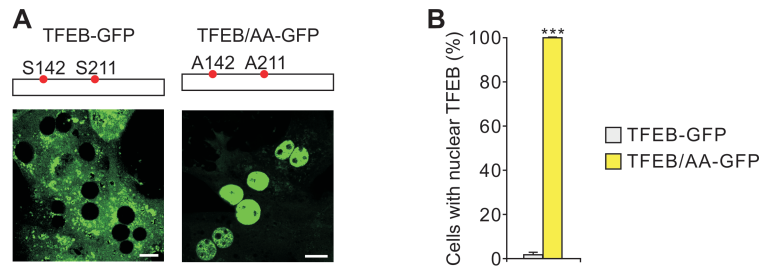

**Supplementary information, Figure S4. Characterization of the nuclear-localized TFEB mutant.** (A) Schematic (top panel) and images (bottom panel) showing the phosphorylation sites and cellular localization of wildtype and mutated TFEB in mouse primary hepatocytes. (B) Quantification of nuclear translocation of wildtype and mutated TFEB in mouse primary hepatocytes. Scale bars, 10  $\mu\text{m}$ .
