# Supplementary material for: Fasting-induced hormonal regulation of lysosomal function
Source: PubMed Central journal article supplement (PMC5518872; doi:10.1038/cr.2017.45), 2017-04-04
Supplement: cr201745x6.pdf [file cr201745x6.pdf]

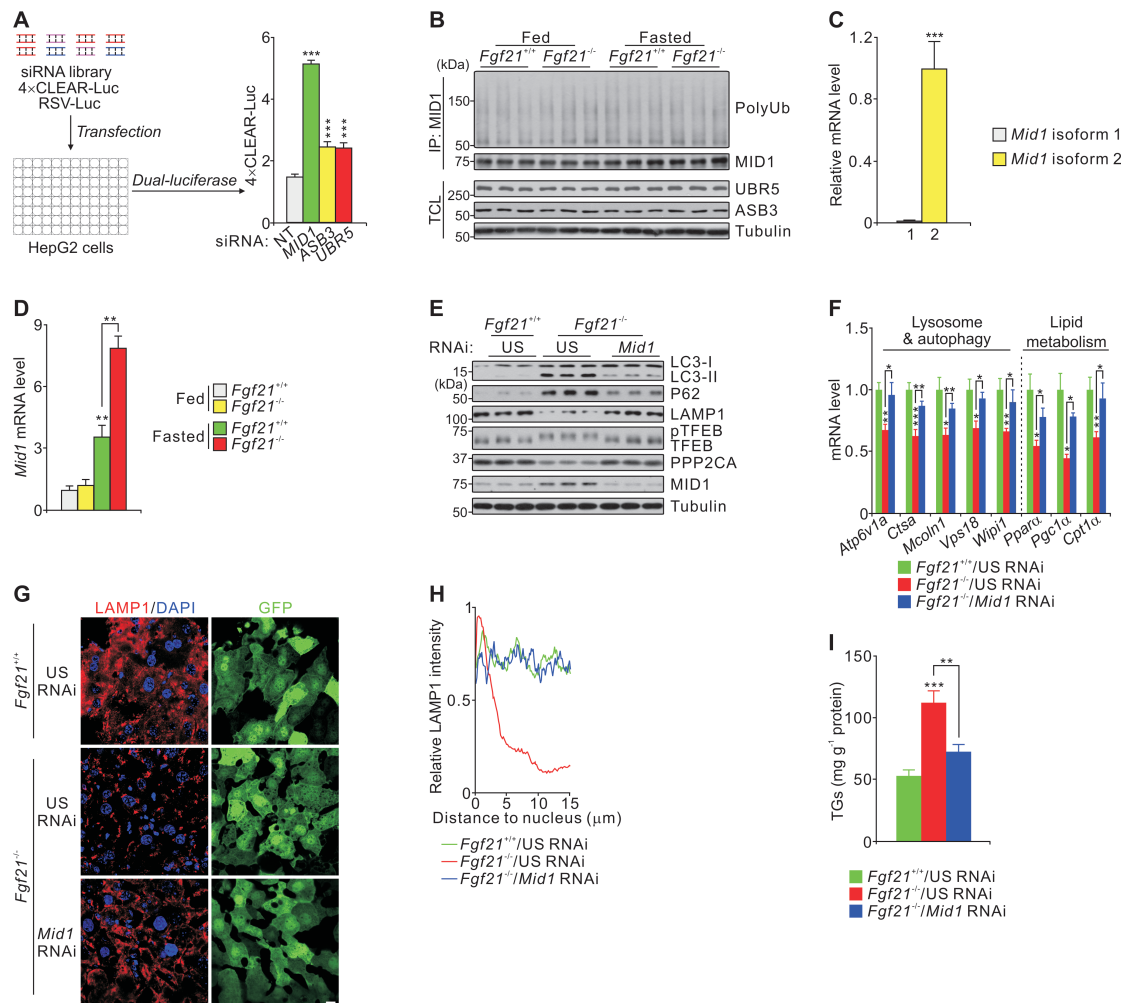

**Supplementary information, Figure S6. MID1 mediates TFEB activity.** (A) siRNA library screening for E3 ligases that modulate the activity of TFEB (measured by 4×CLEAR-Luc activity) in HepG2 cells. (B) Immunoblots showing the levels of UBR5, ASB3 and ubiquitinated MID1 in liver extracts from *Fgf21*<sup>+/+</sup> and *Fgf21*<sup>-/-</sup> mice fed or fasted for 24 h. (C) qPCR results showing relative hepatic levels of *Mid1* isoform 1 and isoform 2 in wildtype mice fed with a regular diet. (D) qPCR results in liver extracts from *Fgf21*<sup>+/+</sup> and *Fgf21*<sup>-/-</sup> mice fed or fasted for 24 h. (E-I), Immunoblots (E), qPCR results (F), LAMP1 staining (G) and quantification (H), and hepatic triglyceride content (I) showing the effect of *Mid1* knockdown in *Fgf21*<sup>-/-</sup> mice fasted for 24

h. Scale bar, 10  $\mu\text{m}$ . Data are shown as mean  $\pm$  s.e.m. \* $P < 0.05$ , \*\* $P < 0.01$ , \*\*\* $P < 0.001$ , n = 8 mice or 5 replicates for HepG2 cells per group.
