# Supplementary material for: Fasting-induced hormonal regulation of lysosomal function
Source: PubMed Central journal article supplement (PMC5518872; doi:10.1038/cr.2017.45), 2017-04-04
Supplement: cr201745x8.pdf [file cr201745x8.pdf]

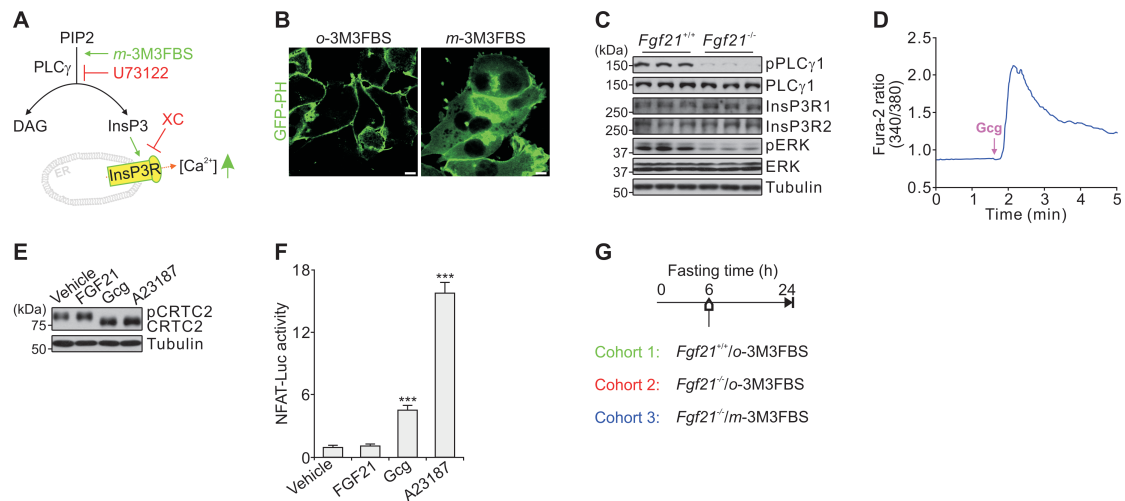

**Supplementary information, Figure S8. Evaluation of PLC activation.**

(A) Diagram showing inhibitor or activator targets. (B) Evaluation of PLC activation, judged by localization of GFP-PH, in mouse primary hepatocytes treated with the PLC activator *m*-3M3FBS. Hepatocytes were incubated with *m*-3M3FBS (10  $\mu$ M) or its inactive analog *o*-3M3FBS (10  $\mu$ M) for 30 min. (C) Immunoblots of liver extracts from *Fgf21*<sup>+/+</sup> and *Fgf21*<sup>-/-</sup> mice fasted for 24 h. (D) Effect of Glucagon (Gcg, 100 nM) on calcium mobilization in mouse primary hepatocytes. (E-F) Effect of FGF21, Gcg and A23187 on CRTC2 dephosphorylation (E) and NFAT-Luc activity (F) in mouse primary hepatocytes. Hepatocytes were incubated with FGF21 (50 ng ml<sup>-1</sup>), Gcg (100 nM) or A23187 (10  $\mu$ M) for 4 h. (G) Schematic showing the protocol for 3M3FBS treatment. After 6 h fasting, mice were given an intraperitoneal injection of 6 mg kg<sup>-1</sup> *o*-3M3FBS or *m*-3M3FBS. Analyses were performed after a further 18 h. Scale bars, 10  $\mu$ m.
